# Supplementary material
Source: Springer Nature journal article supplement (https://www.springermedizin.de/resource/supplementary/12876_2010_521_MOESM2_ESM.pdf/9436908)
Supplement: MOESM2 [file 9436908]

# A: Capillary blood vessel density labeled by CD34

pixel/mm<sup>2</sup>

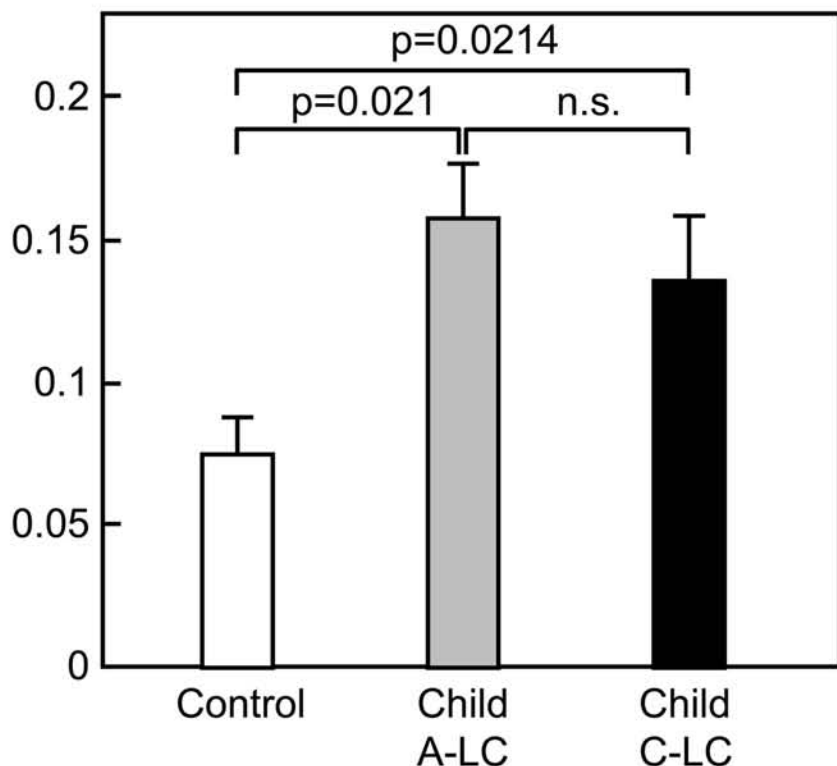

Fisher's PLSD  
One-way Factorial ANOVA

# B: Lymphatic capillary vessel density labeled by D2-40

pixel/mm<sup>2</sup>

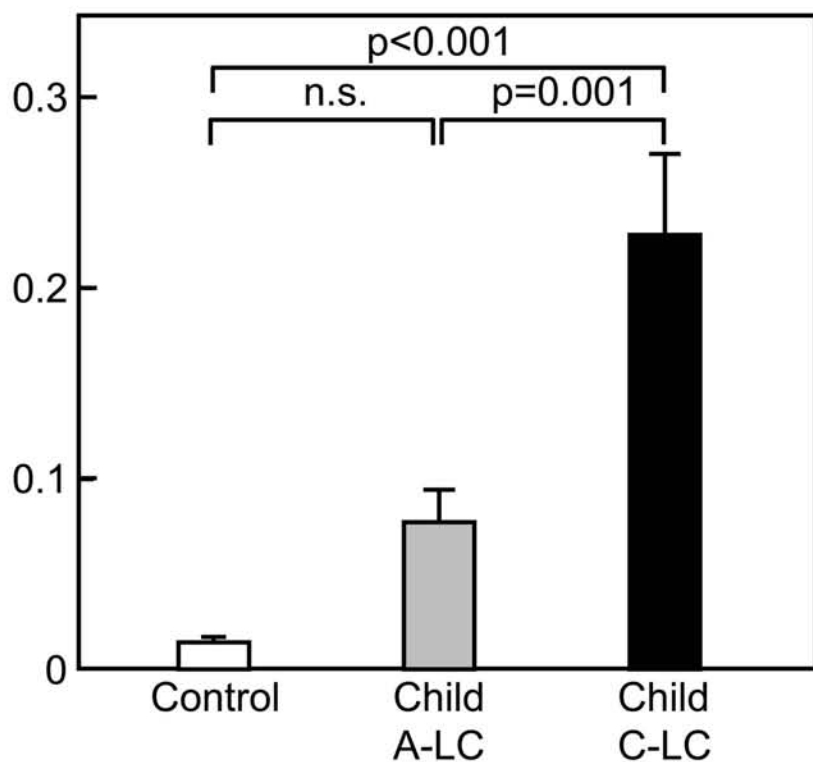

Fisher's PLSD  
One-way Factorial ANOVA
